# Supplementary material for: GRK2 regulates GLP-1R-mediated early phase insulin secretion in vivo
Source: PubMed Central journal article supplement (PMC7931601; doi:10.1186/s12915-021-00966-w), 2021-03-03
Supplement: 12915_2021_966_MOESM1_ESM.pdf [file 12915_2021_966_MOESM1_ESM.pdf]

## Supplementary Figure 1

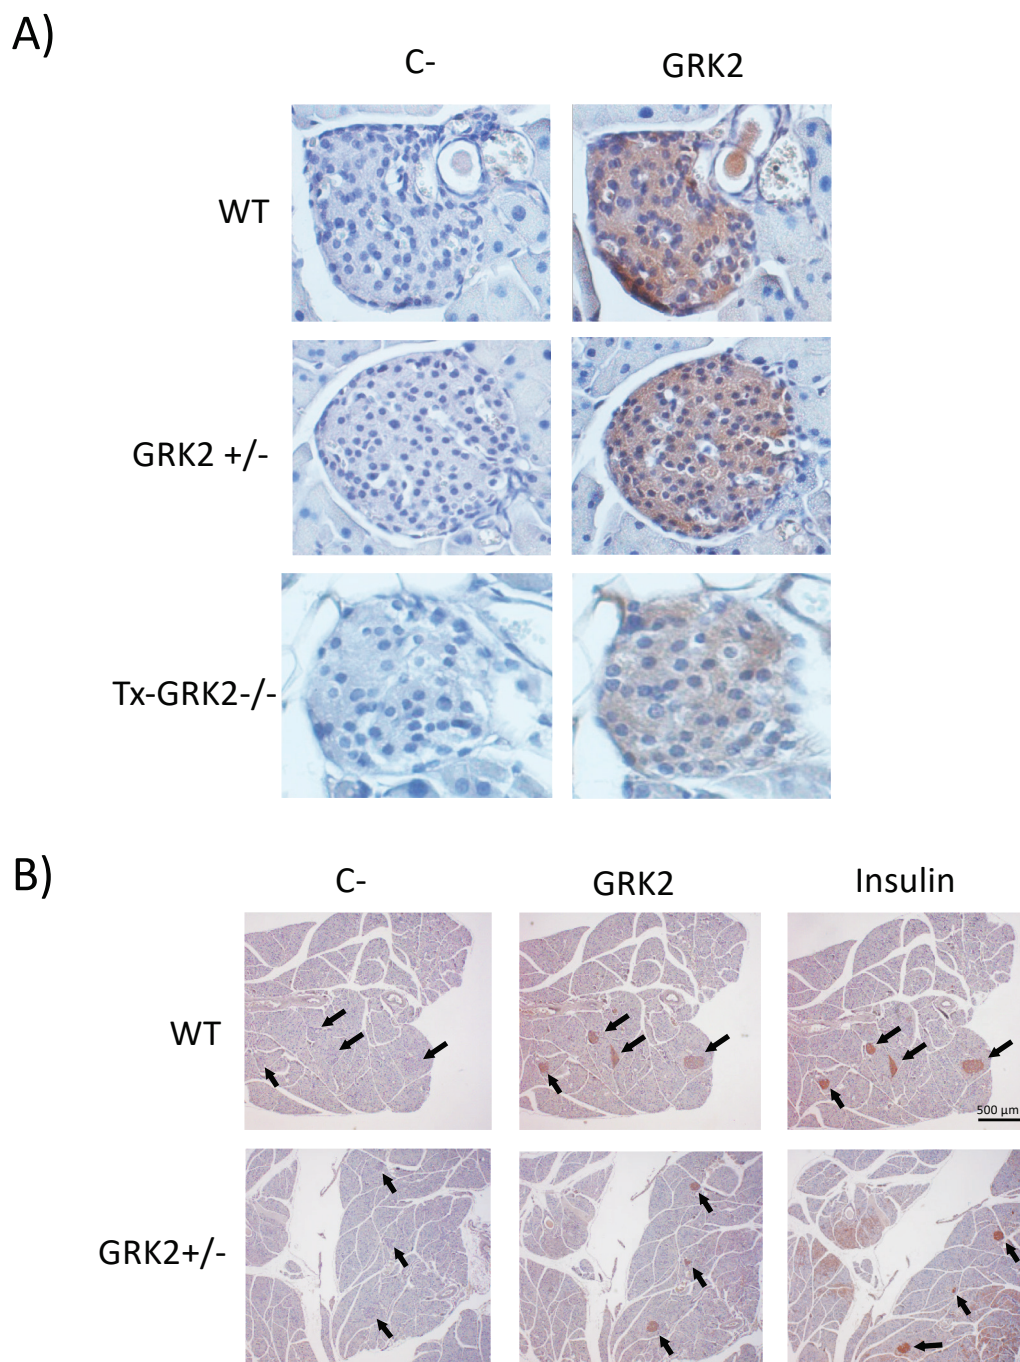

**Additional File 1: Supplementary Figure 1. Control of specificity of GRK2 'PF2' antibody in immunohistochemistry and islets detection in WT and GRK2<sup>+/-</sup> pancreatic sections.** A) Representative photomicrographs showing the immunohistochemical staining of serial pancreatic sections obtained from Tamoxifen-inducible GRK2<sup>-/-</sup> mice (Tx- GRK2<sup>-/-</sup>, Vila-Bedmar et al., 2015), WT and GRK2<sup>+/-</sup> mice using the 'PF2' antibody against GRK2, counterstained with hematoxylin (magnification 40x; image size adjusted to the islet area) or B) pancreas from WT and GRK2<sup>+/-</sup> mice using a 4x magnification and insulin as an islet marker (scale bar, 0.5 mm). Arrows indicate the location of the islets. Incubations without primary antibody were performed as a negative control.
